# Supplementary material for: Quality of clinical evidence and political justifications of ivermectin mass distribution of COVID-19 kits in eight Latin American countries
Source: HighWire-hosted journal article supplement (doi:10.1136/bmjgh-2022-010962), 2023-05-01
Supplement: bmjgh-2022-010962supp002_data_supplement.pdf [file bmjgh-2022-010962supp002_data_supplement.pdf]

**Supplement 2****Nexis Uni search strategy**

Searching All:

Covid-19 AND Ivermectin AND kits AND (Guatemala OR Mexico OR Bolivia OR Brazil OR Panama OR El Salvador OR Honduras OR Peru)

Date Range: 2020-2022

Source: CE Noticias Financieras English or Newstex Blogs or TendersInfo - News or CE Noticias Financieras Portuguese or The Guardian (London) or CNN Wire or The Associated Press or The Independent (United Kingdom) or NAFTA (English) or Associated Press Financial Wire or CNN.com or The New York Times or La Razon, Mexico or Folha de Sao Paulo, Brazil or Financial Times (London, England) or The New York Times - International Edition or La Prensa, Mexico or BBC Brasil

Language: Spanish or English

Results: 607 results

**Targeted web searches of leading newspapers and governmental websites**

General targeted web search conducted through general Google search and Google News search

**Mexico**

Newspapers and News websites: Financiero, Reforma, Animal Politico, El Pais, BMJ, Washington Post, Reuters.

Government websites: Instituto Mexicano del Seguro Social.

Search terms: Mexico, Kits Covid, Ivermectina, Financiero, Reforma, Animal Politico, El Pais, BMJ

Search strategy: Kits Covid AND Mexico AND Ivermectina AND (Financiero OR Reforma OR Animal Politico OR El Pais OR BMJ).

Dates: 2020-2022

**Peru**

Newspapers and News websites: El peruano, La Republica, Nature, Salud con Lupa, Agencia Peruana de Noticias, La Nacion, El Comercio

Government websites: Gobierno del Peru

Search terms. Peru, Kits Ivermectina, COVID 19,

Search strategy: Peru AND Kits Ivermectina AND COVID 19 AND (El peruano OR La Republica, Nature OR Salud con Lupa OR Agencia Peruana de Noticias OR La Nacion OR El Comercio).

Dates: 2020-2022

**Honduras**

Newspapers and News websites: None

Government websites: Secretaria de Salud

Search terms: Ivermectina, Covid-19, Honduras

Search strategy: Ivermectina AND Covid-19 AND Honduras

Dates: 2020-2022

**Brazil**

Newspapers and News websites: Nature, BBC Brazil, O Globo, Folha de Sao Paulo, NPR

Government websites: Imprensa Nacional

Search terms: Kits Covid, Brazil, Ivermectina

Search strategy: Kits Covid AND Brazil AND Ivermectina AND (Nature OR BBC Brazil OR O Globo OR Folha de Sao Paulo OR NPR).

Dates: 2020-2022

**Guatemala**

Newspapers and News websites: Agencia Guatemalteca de Noticias, Salud con Lupa

Government websites: None

Search terms: Guatemala, Kits covid, Ivermectina

Search strategy: Guatemala AND Kits Covid, AND Ivermectina

Dates: 2020-2022

**Panama**

Newspapers and News websites: La Prensa, Nature.

Government websites: Caja de Seguro Social

Search terms: Panama, kits covid, ivermectina

Search strategy: Panama AND Kits Covid, AND Ivermectina

Dates: 2020-2022

**El Salvador**

Newspapers and News websites: Salud con Lupa

Government websites: None

Search terms: El Salvador, Kits Ivermectina

Search strategy: El Salvador AND Kits Ivermectina

Dates: 2020-2022

**Bolivia**

Newspapers and News websites: Reuters.

Government websites: Ministerio de Salud y Deportes de Bolivia

Search terms: Bolivia, Ivermectina.

Search strategy: "bolivia reparte kits con ivermectina" AND secretaria de salud

Dates: 2020-2022
