# Supplementary material for: Quality of clinical evidence and political justifications of ivermectin mass distribution of COVID-19 kits in eight Latin American countries
Source: HighWire-hosted journal article supplement (doi:10.1136/bmjgh-2022-010962), 2023-05-01
Supplement: bmjgh-2022-010962supp003_data_supplement.pdf [file bmjgh-2022-010962supp003_data_supplement.pdf]

**Supplement 3: COVID-19 kit contents by country.**

|                       | Brazil             | Honduras           | Peru            | Panama             | Bolivia            | El Salvador        | Guatemala          | Mexico          |
|-----------------------|--------------------|--------------------|-----------------|--------------------|--------------------|--------------------|--------------------|-----------------|
| Provider              | Ministry of Health | Ministry of Health | Social Security | Ministry of Health | Ministry of Health | Ministry of Health | Ministry of Health | Social Security |
| Acetaminophen         |                    |                    | ✓               | ✓                  |                    | ✓                  | ✓                  |                 |
| Acetylsalicylic acid  | ✓                  |                    |                 |                    | ✓                  | ✓                  | ✓                  |                 |
| Azithromycin          |                    | ✓                  | ✓               | ✓                  | ✓                  | ✓                  | ✓                  | ✓               |
| Hydroxychloroquine    | ✓                  |                    |                 | ✓                  |                    |                    |                    |                 |
| Ivermectin            | ✓                  | ✓                  | ✓               | ✓                  | ✓                  | ✓                  | ✓                  | ✓               |
| Loratadine            |                    |                    |                 | ✓                  | ✓                  | ✓                  | ✓                  |                 |
| Prednisone            | ✓                  |                    |                 |                    |                    |                    |                    |                 |
| Vit C, D and zinc     |                    | ✓                  |                 | ✓                  |                    | ✓                  | ✓                  |                 |
| Start of distribution | May 2020           | June 2020          | July 2020       | July 2020          | August 2020        | August 2020        | August 2020        | December 2020   |
| End of distribution   | -                  | -                  | Mar-21          | Dec-21             | -                  | -                  | -                  | Jan-22          |
