# Supplementary material for: Quality of clinical evidence and political justifications of ivermectin mass distribution of COVID-19 kits in eight Latin American countries
Source: HighWire-hosted journal article supplement (doi:10.1136/bmjgh-2022-010962), 2023-05-01
Supplement: bmjgh-2022-010962supp004_data_supplement.xlsx [file bmjgh-2022-010962supp004_data_supplement.xlsx]

## Sheet: Publication timeline
Main author	Date of publication	Title of the publication	Site of publication	Study funding	Institution of the main author	Retracted (yes/no)	Risk of Bias Level (GRADE)	Sample size	Ivermectin Arm	Control arm (Non-Ivermectin)	Objective	Objective Summary	Objective Group	Conclusion Summary	URL
Caly et al.	2020-04-03	The FDA-approved drug ivermectin inhibits the replication of SARS-CoV-2 in vitro	Antiviral Research	National Breast Cancer Foundation Fellowship, Australia for KMW and an National Healthand Medical Research Council, Australia Senior Prinicple Research Fellow (SPRF)	Victorian Infectious Diseases Reference Laboratory, Royal Melbourne Hospital, At the Peter Doherty Institute for Infection and Immunity, Australia	No		-	-	-					-
Shakhsi Niaee et al.	2021-06-25	Ivermectin as an adjunct treatment for hospitalized adult COVID-19 patients: a randomized multi-center clinical trial	Asian Pacific Journal of Tropical Medicine	None declared	Sciences and Technology Park, Qazvin, Iran	No	Risk of Bias	180	120	60	To evaluate different doses of ivermectin in adult patients with mild COVID-19 and to evaluate the effect of ivermectin on mortality and clinical consequences	Hospitalized patients	3	+	10.4103/1995-7645.318304
Vallejos et al.	2020-11-24	Ivermectin to prevent hospitalizations in patients with COVID-19 (IVERCOR-COVID19): a structured summary of a study protocol for a randomized controlled trial.	BMC	Ministry of Health of the Province of Corrientes, Argentina	Instituto de Cardiología de Corrientes“Juana F. Cabral”, Corrientes, Argentina	No	Risk of Bias	501	250	251	To determine whether ivermectin treatment can prevent hospitalization in individuals with early COVID19.	Prevent hospitalization	1	-	https://doi.org/10.1186/s13063-020-04813-1
Okumuş et al.	2021-05-04	Evaluation of the effectiveness and safety of adding ivermectin to treatment in severe COVID-19 patients	BMC Infectious Diseases	Afyonkarahisar Health Science University Scientific Research project Coordination Unit Project.	Afyonkarahisar Health Sciences University, Afyonkarahisar, Turkey	No	Risk of Bias	66	36	30	In this study; it was aimed to investigate the presence of genemutations that alter ivermectin metabolism and cause toxic effects in patients with severe COVID-19 pneumonia,and to evaluate the effectiveness and safety of ivermectin use in the treatment of patients without mutation	In patients with severe COVID	3	+	https://doi.org/10.1186/s12879-021-06104-9
Rajter et al	2021-01-01	Use of Ivermectin Is Associated With Lower Mortality in Hospitalized PatientsWith Coronavirus Disease 2019	Chest Infections	No Funding	Broward Health Medical Center, Fort Lauderdale	No	Risk of Bias	280	173	107	Prove if ivermectin benefit hospitalized coronavirus disease 2019 patients. The primary outcome was all-cause in-hospitalmortality. Secondary outcomes included mortality in patients with severe pulmonary involvement,extubation rates for mechanically ventilated patients, and length of stay.	Reduction of in-hospital mortality	3	+	https://doi.org/10.1016/j.chest.2020.10.009
Shahbaznejad et al.	2021-05-06	Effects of ivermectin in patients With COVID-19: a multicenter, double-blind, randomized, controlled clinical trial.	Clinical Therapeutics	None declared	Pediatric Infectious Diseases Research Center,Communicable Diseases Institute, Mazandaran University of Medical Sciences, Sari, Iran	No	Risk of Bias	69	35	34	This study aimed to evaluate the effects of the widely used antiparasitic drug ivermectin on outcomes in patients with COVID-19	Length of hospitalization	3	+	10.1016/j.clinthera.2021.04.007
Krolewiecki et al	2021-06-17	Antiviral effect of high-dose ivermectin in adults with COVID-19: a pilot randomised, controlled, open label, multicentre trial.	EClinicalMedicine	AgenciaNacional de Promocioon de la Investigacion, el Desarrollo Tecnoloogico y la Innovacion, Argentina and Laboratorio ELEA/Phoenix	Instituto de Investigaciones de Enfermedades Tropicales (IIET-CONICET), Sede Regional Or_x0013_an, Universidad Nacional de Salta, Alvarado, Argentina	Corrigendum	Risk of Bias	45	30	15	This study aimed at assessing the antiviral effect of IVM on viral load of respiratory secretionsand its relationship with drug concentrations in plasma.	Viral load	2	?	https://doi.org/10.1016/j.eclinm.2021.100959
Chaccour et al	2021-01-19	The effect of early treatment with ivermectin on viral load, symptoms and humoral response in patients with non-severe COVID-19: a pilot, double-blind, placebo-controlled, randomized clinical trial.	EClinicalMedicine	ISGlobal and the University of Navarra	Hospital Clínic - Universitat de Barcelona	No	Some concerns	24	12	12	The main objective was to determine the efficacy of a single doseof ivermectin, administered to low risk, non-severe COVID-19patients in thefirst 72 h after fever or cough onset to reduce onwardtransmission	Treatment or prevention of transmission	1	?	https://doi.org/10.1016/j.eclinm.2020.100720
Chowdhury et al.	2021-02-25	A randomised trial of ivermectin-doxycycline and hydroxychloroquine-azithromycin therapy on COVID19 patients.	Eurasian Journal of Medicine and Oncology	None declared	Department of Gastroenterology, First Affiliated Hospital of Xi’an Jiaotong University, Xi’an, Shaanxi, P.R. China	No	Risk of Bias	116	60	56	We investigated the outcomes of Ivermectin-Doxycycline vs. Hydroxychloroquine-Azithromycin combina-tion therapy in mild to moderate COVID19 patients	Length of hospitalization	3	+	10.14744/ejmo.2021.16263
Podder et al.	2020-09-03	Outcome of ivermectin treated mild to moderate COVID-19 cases: a single-centre, open-label, randomized controlled study	IMC J. Med. Science,	Self-financed	Debidwar Upazila Health Complex, Debidwar, Comilla, Bangladesh.	No	Risk of Bias	62	32	30	This study evaluatedthe outcomeof ivermectintreated mild to moderate COVID-19 cases compared to usual care	Treatment mild/moderate	1	-	https://c19ivermectin.com/podder.html
Kishoria et al.	2020-08-01	IVERMECTIN AS ADJUVANT TO HYDROXYCHOLOROQUINE IN PATIENTS RESISTANT TO STANDARD TREATMENT FOR SARS-CoV-2: RESULTS OF AN OPEN-LABEL RANDOMIZED CLINICAL STUDY	Indian Journal of Research	None declared	Dr. S. N. Medical College	No	Risk of Bias	32	19	13	To assess the efficacy of ivermectin as adjuvant drug in patients resistant to standard treatment for SARS-Cov-2 and to compare the efficacy of ivermectin plus hydroxychloroquine with hydroxychloroquine alone in patients resistant to standard treatment for SARS-CoV-2	Adjuvant treatment in hospitalized patients	3	?	DOI : 10.36106/par
Buonfrate et al.	2022-01-06	High-dose ivermectin for early treatment of COVID-19 (COVER study): a randomised, double-blind, multicentre, phase II, dose-finding, proof-of-concept clinical trial	International Journal of Antimicrobial Agents	Insud Pharma, Mundo Sano, Alpine Lions Co- operation, Italian Ministry of Health ‘Fondi Ricerca Corrente’ Cuore Don Calabria Hospital.	Department of Infectious Tropical Diseases and Microbiology, IRCCS SacroCuore–Don Calabria Hospital,Negrardi Valpolicella, Verona, Italy	No	Low Risk	93	61	32	The aim of this study was to assess the safety and efficacy of high-dose ivermectin in reducing viral load in individuals with early SARS-CoV-2 infection	Viral load	2	-	https://doi.org/10.1016/j.ijantimicag.2021.106516
Ahmed et al.	2020-12-02	A five day course of ivermectin for the treatment of COVID-19 may reduce the duration of illness.	International Journal of Infectious Diseases	Beximco Pharmaceutical Limited, Bangladesh.	International Centre for Diarrhoeal Disease Research, Bangladesh	No	Risk of Bias	68	45	23	To determine the rapidity of viral clearance and safety of ivermectin among adult SARS-CoV-2 patients.	Rapidity of viral clearance	2	+	https://doi.org/10.1016/j.ijid.2020.11.191
Aref et al.	2021-06-15	Clinical, Biochemical and Molecular Evaluations of Ivermectin Mucoadhesive Nanosuspension Nasal Spray in Reducing Upper Respiratory Symptoms of Mild COVID-19	International Journal of Nanomedicine	South Valley University, Faculty of Medicine, Qena 83523, Egypt.	ENT Department, Faculty of Medicine, South Valley University, Qena, Egypt	No	Risk of Bias	114	57	57	We aimed to assess the therapeutic efficacy of ivermectin mucoadhesive nano-suspension intranasal spray in treatment of patients with mild COVID-19	Nanosuspension Treatment	2	+	https://doi.org/10.2147/IJN.S313093
Chachar et al.	2020-09-01	Effectiveness of ivermectin in SARS-CoV-2/COVID-19 patients.	International Journal of Sciences	None declared	Not disclosed	No	Risk of Bias	50	25	25	To assess the efficacy of Ivermectin in mildcasesofCOVID-19 patients on the basis of predefined assessment criteria	Treatment mild	1	-	DOI: 10.18483/ijSci.2378
Ravikirti et al.	2021-07-15	Evaluation of Ivermectin as a Potential Treatment for Mild to Moderate COVID-19: A Double-Blind Randomized Placebo Controlled Trial in Eastern India	J Pharm Pharm Sci	Patna Administration. Sun Pharma	Department of General Medicine, All India Institute of Medical Sciences, Patna, Bihar, India	No	Some concerns	112	55	57	This trial was conducted to test the efficacy of ivermectin in mild and moderate coronavirus disease 19 (COVID-19).	Hospitalized patients	3	-	10.18433/jpps32105
López Medina et al.	2021-03-04	Effect of ivermectin on time to resolution of symptoms among adults with mild COVID-19: a randomized clinical trial	JAMA	Centro de Estudios en Infectología Pediátrica	Centro de Estudios en Infectología Pediátrica, Cali, Colombia	No	Some concerns	398	200	198	To determine whether ivermectin is an efficacious treatment for mild COVID-19. Patients with mild disease and symptoms for 7 days or fewer (at home or hospitalized)	Resolution of symptions	2	-	doi:10.1001/jama.2021.3071
S. C. L. Lim et al.	2022-02-18	Efficacy of Ivermectin Treatment on Disease Progression Among Adults With Mild to Moderate COVID-19 and Comorbidities The I-TECH Randomized Clinical Trial	JAMA	Corrected for publicing funding source	Department of Medicine,Raja Permaisuri Bainun Hospital, Perak, Malaysia	No	Some concerns	500	250	250	To determine the efficacy of ivermectin in preventing progression to severedisease among high-risk patients with COVID-19	Prevent Progression	1	-	doi:10.1001/jamainternmed.2022.0189
Shoumann et al	2021-02-01	Use of Ivermectin as a Potential Chemoprophylaxis for COVID-19 in Egypt	Journal of Clinical and Diagnostic Research	None declared	Professor, Department of Chest Medicine, Zagazig University, Faculty of Medicine Zagazig, Al-Sharkia, Egypt	No	Risk of Bias	304	203	101	The study aimed to evaluate possible role of oral ivermectin as a chemoprophylaxis in asymptomatic family close contacts with COVID-19 patients.	Prophylaxis after close contact	1	+	DOI: 10.7860/JCDR/2021/46795.14529
Mohan et al.	2021-08-25	Ivermectin in mild and moderate COVID-19 (RIVET-COV): a randomized placebo-controlled trial.	Journal of Infection and Chemotherapy	Science and Engineering Research Board, Department of Science and Technology, Government of India	All India Institute of Medical Sciences	No	Some concerns	157	104	53	The co-primary outcomes were conversion of RT-PCR to negative result and the decline of viral load at day 5 of enrolment.	Viral load	2	-	https://doi. org/10.1016/j.jiac.2021.08.021
Mahmud et al.	2021-04-06	Ivermectin in combination with doxycycline for treating COVID-19 symptoms: a randomized trial.	Journal of International Medical Research	No Funding	Dhaka Medical College	No	Risk of Bias	400	200	200	We evaluated whether ivermectin combined with doxycycline reduced the clinicalrecovery time in adults with COVID-19 infection	Adjuvant Treatment	2	+	10.1177/03000605211013550
Abd-Elsalam	2021-05-31	Clinical study evaluating the efficacy of ivermectin in COVID‐19 treatment: a randomized controlled study.	Journal of Medical Virology	None declared	Department of Tropical Medicine and Infectious diseases, Faculty of Medicine,Tanta University, Tanta, Egypt	No	Risk of Bias	164	82	82	This study aimed toevaluate the efficacy of ivermectin for the treatment of hospitalized mild to mod-erate COVID‐19 infected patients.	Treatment of hospitalized mild to mod-erate COVID‐19 infected patients.	3	?	10.1002/jmv.27122
Elalfy et al.	2021-02-13	Effect of a combination of nitazoxanide, ribavirin, and ivermectin plus zinc supplement (MANS.NRIZ study) on the clearance of mild COVID-19	Journal of Medical Virology	Mansoura University Funding Research Unit.	Tropical Medicine and HepatologyDepartment, Mansoura Faculty of Medicine,Mansoura University, Mansoura, Egypt	No	Risk of Bias	113	62	51	This trial compared the rate and time of viral clearance in subjects receivinga combination of nitazoxanide, ribavirin, and ivermectin plus Zinc versus thosereceiving supportive treatment.	Viral clearence	2	+	DOI: 10.1002/jmv.26880
Ozer, Muhamme	2021-11-19	Effectiveness and safety of Ivermectin in COVID-19 patients: A prospective study at a safety-net hospital	Journal of Medical Virology	No Funding	Department of Internal Medicine, CapitalHealth Medical Center, Trenton,New Jersey, USA	No	Risk of Bias	286	60	226	To assess the effec-tiveness and safety of ivermectin in hospitalized patients with COVID‐19	Length of hospitalization	3	-	10.1002/jmv.27469
Beltrán González et al.	2021-02-23	Efficacy and safety of ivermectin and hydroxychloroquine in patients with severe COVID-19. A randomized controlled trial.	medRxiv	None declared	Internal Medicine Department Centenario Hospital Miguel Hidalgo	No	Risk of Bias	106	36	70	This clinical trial analyzes the efficacy of Ivermectin and Hydroxychloroquine in patients with moderate COVID-19 and in need of hospitalization.	Treatment of moderate covid in hospitalized patients	3	-	https://doi.org/10.1101/2021.02.18.21252037
Biber et al.	2021-05-31	Favorable outcome on viral load and culture viability using Ivermectin in early treatment of non-hospitalized patients with mild COVID-19 – A double-blind, randomized placebo-controlled trial	medRxiv	No Funding	The Center for Geographic Medicine and Tropical Diseases, Sheba Medical Center, Ramat Gan, Israel	No	Risk of Bias	89	47	42	Ivermectin, an anti-parasitic agent, also has anti-viral properties. Our aim was to assess whether ivermectin can shorten the viral shedding in patients at an early-stage of COVID-19 infection.	Viral Shedding	2	+	doi.org/10.1101/2021.05.31.21258081
Hashim et al.	2020-10-27	Controlled randomized clinical trial on using ivermectin with doxycycline for treating COVID-19 patients in Baghdad, Iraq	medRxiv	Baghdad-Alkarkh General Directorate of Health in Bghadad, Iraq	Alkarkh Hospital, Alatefiya, Baghdad, Iraq	No	Risk of Bias	140	70	70	COVID-19 patients suffer from the lack of curative therapy. Hence, there is an urgent need to try repurposed old drugs on COVID-19. The time to recovery, the progression of the disease, and the mortality rate were the outcome-assessing parameters.	Treatment mild/moderate in hospitalized patients	3	+	https://doi.org/10.1101/2020.10.26.20219345
Hussain et al.	2021-02-05	Efficacy of Ivermectin in COVID-19 Patients with Mild to Moderate Disease	medRxiv	Not applicable	Department of Medicine Combined Military Hospital Lahore	No	Risk of Bias	86	41	45	To evaluate the efficacy of ivermectin (IVM) as an addition to the standard of care (SOC) treatment in COVID-19 patients with mild and moderate disease	Viral clearence	2	+	https://doi.org/10.1101/2021.02.02.21250840
Fonseca Galán et al.	2021-03-08	Phase 2 randomized study on chloroquine, hydroxychloroquine or ivermectin in hospitalized patients with severe manifestations of SARS-CoV-2 infection	Pathogens and Global Health	None declared	Department of Infectious Diseases of Hospital Geral De Roraima. Universidade Federal De Roraima. Boa Vista Brazil;	No	Low Risk	168	53	115	Given the urgent need for strategies to minimize the damage caused by this pandemic, this study performed a randomized, double-blind phase 2 study to assess the safety of the effectiveness of chloroquine (CQ), hydroxychloroquine (HCQ) or ivermectin in severe forms of COVID-19, in addition to identifying predictors of mortality in this group of patients.	in hospitalized patients	3	-	https://doi.org/10.1080/20477724.2021.1890887
Babalola et al.	2021-02-18	Ivermectin shows clinical benefits in mild to moderate COVID19: a randomised controlled double-blind, dose-response study in Lagos.	QJM: An International Journal of Medicine	Central Bank of Nigeria Health Sector Research and Development Intervention Scheme	Department of Ophthalmology, Bingham University, Karu/Jos, Nassarawa/Plateau state, Nigeria	No	Risk of Bias	62	42	20	We set out to explore the efficacy and safety of Ivermectin in persons infected with COVID19	Proof of concept	2	+	10.1093/qjmed/hcab035
Chahla et al.	2021-05-06	Cluster randomised trials - ivermectin repurposing For COVID-19 treatment of outpatients with mild disease in primary health care centers.	Research Square	Ministry of Public Health. Tucumán, Argentina	Ministry of Public Health Tucumán	No	Risk of Bias	254	110	144	This study aims to evaluate the use of ivermectin in mild-stage patients to increase outpatient dischargeand prevent the progression to moderate or severe stages of the disease.	Increase outpatient discharge and prevent the progression to moderate or severe stages of the disease	1	+	https://doi.org/10.21203/rs.3.rs-495945/v1
Elgazzar et al.	2020-12-28	Efficacy and safety of ivermectin for treatment and prophylaxis of COVID-19 pandemic.	Research Square	No Funding	Banha University	Yes	Risk of Bias	600	200	400	Aims to evaluate the anti-parasitic medication efficacy "Ivermectin" plus standard care in the treatment ofmild/moderate and severely ill cases with COVID 19 infection, as well as prophylaxis of health care and/ or household contacts.	Treatment of mild to severe COVID-19	2	+	https://doi.org/10.21203/rs.3.rs-100956/v3
Reis et al.	2022-03-30	Effect of Early Treatment with Ivermectin among Patients with Covid-19	The New England Journal of Medicine	Fast Grants and the Rainwater Charitable Foundation	Research Division, Cardresearch–Cardiologia Assistencial e de Pesquisa	No	Low Risk	3515	679	2836	The efficacy of ivermectin in preventing hospitalization or extended observation in an emergency setting among outpatients with acutely symptomatic coronavirus dis-ease 2019 (Covid-19), the disease caused by severe acute respiratory syndrome coro-navirus 2 (SARS-CoV-2), is unclear	Prevention of hospital admissions	1	-	DOI: 10.1056/NEJMoa2115869
Pott Junior et al.	2021-03-09	Use of ivermectin in the treatment of Covid-19: A pilot trial	Toxicology Reports	No Funding	Department of Medicine, Federal University of Sao Carlos	Yes	Risk of Bias	31	27	4	In this randomized open-label trial pilot study we assessed the antiviral effects and safety of various doses of ivermectin in patients with mild clinical symptoms of COVID-19.	Treatment	1	+	https://doi.org/10.1016/j.toxrep.2021.03.003
								9185
		Unrelated to the question of prevention of hospitalization
		Somewhat related to the question on hospitalization
		findings relevant in addressing the question whether ivermectin prevent hospitalization
